# Supplementary material for: The study of calcified atherosclerotic arteries: an alternative to evaluate the composition of a problematic tissue reveals new insight including metakaryotic cells
Source: Springer Nature journal article supplement (doi:10.1186/s12907-016-0036-6), 2016-07-29
Supplement: MOESM2 [file 10544354]

**Additional file 1: Table S1. Feulgen image analysis densitometry protocol with automatic measurement program wizard.**

| STEP | Operation                                | Comments                                                                                                                                                                                                                                                                                                                                              | Window                                                                                                                                                                                                                                                    |                            |
|------|------------------------------------------|-------------------------------------------------------------------------------------------------------------------------------------------------------------------------------------------------------------------------------------------------------------------------------------------------------------------------------------------------------|-----------------------------------------------------------------------------------------------------------------------------------------------------------------------------------------------------------------------------------------------------------|----------------------------|
| 1    | Image enhancement                        | Alignment - Exposure –<br>White balance -                                                                                                                                                                                                                                                                                                             | Optical enhancement<br>including brightness,<br>contrast, and gamma<br>correction                                                                                                                                                                         | LIVE                       |
| 2    | Multidimensional image acquisition       | Exposure (the same as step 1<br>- Set all channel into the<br>dynamic range – start –<br>measure – save as xxx in<br>folders – start taking picture                                                                                                                                                                                                   | Camera set up and<br>saving parameters.<br>When you capture<br>picture always use<br>the window 6D and<br>never the Live<br>window for DNA<br>quantification. It is<br>important to organize<br>al images in separate<br>folders                          | 6D acquisition             |
| 3    | Set Automatic Measurement Program Wizard | Open an image – Measure –<br>Automatic multidimensional<br>measurement – new program.<br><br>Select: Sigma filter NO –<br>Shading Correction NO –<br>Edge Enhancement NO.<br><br>Select the object of interest<br>with the pick up tools and then<br>open “advanced” options:<br>refine selection with the<br>histogram and then set up as<br>follow: | Generate the<br>program that allows<br>you to analyses<br>images.<br><br>Brightness, contrast,<br>and gamma<br>correction.<br><br>Segmentation is the<br>most important part:<br>you separate the<br>nuclei you want to<br>measure from the<br>background | Wizard<br><br>Segmentation |

Deletion of artifacts: remove - Interactive processing  
 Fill holes YES - Automatic of the measurement  
 object separation YES - Mode mask  
 Erosion/Dilation YES -  
 Watersheds NO  
 Set measurement properties: Set measurement Definition of a  
 Region feature (for a nucleus) properties Measurement  
 - Field feature (for all area) - Condition  
 Draw features  
 Measures Features: Chose Measures Measurement  
 Densitometric SUM, Features and check  
 Densitometric AREA selected objects for  
 Densitometric SD artefacts /  
 overlapping.

4 Run Automatic Measure menu - Run Execute a program Run Automatic  
 Measurement Program Automatic Multidimensional you have generated Measurement  
 program -Execute for any number of Program  
 images saved.
